# Supplementary material for: The Micronesia Challenge: Assessing the Relative Contribution of Stressors on Coral Reefs to Facilitate Science-to-Management Feedback
Source: PubMed Central journal article supplement (PMC4473011; doi:10.1371/journal.pone.0130823), 2015-06-18
Supplement: pone.0130823.s004.pdf [file pone.0130823.s004.pdf]

Table S1. Biological metrics used to evaluate coral-reef ecosystem conditions that were related reef processes and ecological principles.

| <b>METRIC</b>                                                         | <b>KEY PROCESSES</b>                                                                                                           | <b>FOUNDATIONAL PRINCIPLES</b>                                                                                                                     | <b>SUPPORTING CITATIONS</b>                 |
|-----------------------------------------------------------------------|--------------------------------------------------------------------------------------------------------------------------------|----------------------------------------------------------------------------------------------------------------------------------------------------|---------------------------------------------|
| <b>FISH ASSEMBLAGE SIZE</b>                                           | Grazing, disturbance resistance, recovery potential, distribution of diversity across trophic guilds, sustainable provisioning | Allometry, reproduction, niche partitioning, distribution of biomass across fast/slow energy pathways in food webs, size-based fishery regulations | [1] [2] [3] [4] [5] [6] [7] [8] [9] [10,11] |
| <b>FISH ASSEMBLAGE BIOMASS</b>                                        | Disturbance resistance, recovery potential, carbon sequestration, sustainable provisioning                                     | Food web stability, Nutrient cycling, harvesting quotas,                                                                                           | [11-17]                                     |
| <b>PREDATOR BIOMASS</b>                                               | Competitive dominance in lower trophic guilds, carbon sequestration, ecosystem function                                        | Predation, competition, diversity maintenance, trophic cascades, food web stability                                                                | [13,14,18-20]                               |
| <b>FISH ASSEMBLAGE HETEROGENEITY AND EVENNESS</b>                     | Disturbance resistance, recovery potential                                                                                     | Response diversity, functional redundancy, food web stability                                                                                      | [18,21-27]                                  |
| <b>BENTHIC SUBSTRATE RATIO<sup>1</sup></b>                            | Reef calcification and accretion, carbon sequestration                                                                         | Competition, slow energy pathways in food webs                                                                                                     | [10,16,28-30]                               |
| <b>CORAL COVER</b>                                                    | Habitat formation and complexity, reef calcification and accretion, carbon sequestration                                       | Nutrient cycling, fundamental niche creation, slow energy pathways in food webs                                                                    | [31-34]                                     |
| <b>MACROALGAL COVER</b>                                               | Competition, grazing, carbon recycling                                                                                         | Nutrient cycling, herbivore response, fast energy pathways in food webs                                                                            | [16,28-30]                                  |
| <b>CORAL EVENNESS, SPECIES RICHNESS, AND ASSEMBLAGE HETEROGENEITY</b> | Habitat complexity, disturbance resistance, recovery potential                                                                 | Response diversity, functional diversity, food web stability                                                                                       | [4, 31-35]                                  |
| <b>CORAL ASSEMBLAGE SKEWNESS</b>                                      | Recruitment, habitat complexity, habitat formation                                                                             | Allometry, fundamental niche creation, fast/slow energy pathways in food                                                                           | [16,33,36,37]                               |

webs, population  
dynamics

## References

1. Birkeland C, Dayton PK (2005) The importance in fishery management of leaving the big ones. *Trends Ecol Evol* 20: 356-358.
2. Lokrantz J, Nyström M, Thyresson M, Johansson C (2008) The non-linear relationship between body size and function in parrotfishes. *Coral Reefs* 27: 967-974.
3. Sweatman H (2008) No-take reserves protect coral reefs from predatory starfish. *Curr Biol* 18: R598-R599.
4. Houk P, Benavente D, Fread V (2012) Characterization and evaluation of coral reefs around Yap Proper, Federated States of Micronesia. *Biodiver Conserv* 21: 2045-2059.
5. Piet G, Pet J, Guruge W, Vijverberg J, Van Densen W (1999) Resource partitioning along three niche dimensions in a size-structured tropical fish assemblage. *Canadian J Fish Aquat Sci* 56: 1241-1254.
6. Welsh J, Goatley C, Bellwood D (2013) The ontogeny of home ranges: evidence from coral reef fishes. *Proc Roy Soc B: Biol Sci* 280: 20132066.
7. Hutchinson GE (1959) Homage to Santa Rosalia or why are there so many kinds of animals? *Am Nat*: 145-159.
8. Worm B, Hilborn R, Baum JK, Branch TA, Collie JS, et al. (2009) Rebuilding global fisheries. *Science* 325: 578-585.
9. Rooney N, McCann KS, Moore JC (2008) A landscape theory for food web architecture. *Ecol Lett* 11: 867-881.
10. Rooney N, McCann KS (2012) Integrating food web diversity, structure and stability. *Trends Ecol Evol* 27: 40-46.
11. Banse K (2007) Do we live in a largely top-down regulated world? *J Biosci* 32: 791-796.
12. Vanni MJ (2002) Nutrient cycling by animals in freshwater ecosystems. *Annu Rev Ecol System*: 341-370.
13. Estes JA, Terborgh J, Brashares JS, Power ME, Berger J, et al. (2011) Trophic downgrading of planet Earth. *Science* 333: 301-306.
14. Vanni MJ, Layne CD, Arnott SE (1997) "Top-down" trophic interactions in lakes: effects of fish on nutrient dynamics. *Ecology* 78: 1-20.
15. Costello C, Gaines SD, Lynham J (2008) Can catch shares prevent fisheries collapse? *Science* 321: 1678-1681.
16. Hoegh-Guldberg O, Mumby P, Hooten A, Steneck R, Greenfield P, et al. (2007) Coral reefs under rapid climate change and ocean acidification. *Science* 318: 1737-1742.
17. Mumby PJ, Dahlgren CP, Harborne AR, Kappel CV, Micheli F, et al. (2006) Fishing, trophic cascades, and the process of grazing on coral reefs. *Science* 311: 98-101.
18. Houk P, Benavente D, Iguel J, Johnson S, Okano R (2011) Coral reef disturbance and recovery dynamics differ across gradients of localized stressors in the Mariana Islands. *PLoS ONE* 9:e105731.
19. Burkepille DE, Allgeier JE, Shantz AA, Pritchard CE, Lemoine NP, et al. (2013) Nutrient supply from fishes facilitates macroalgae and suppresses corals in a Caribbean coral reef ecosystem. *Scientific Reports* 3: 1493.
20. Bascompte J, Melián CJ (2005) Simple trophic modules for complex food webs. *Ecology* 86: 2868-2873.

21. Mellin C, Bradshaw C, Fordham D, Caley M (2014) Strong but opposing  $\beta$ -diversity–stability relationships in coral reef fish communities. *Proc Roy Soc B: Biol Sci* 281: 20131993.
22. Thibaut LM, Connolly SR, Sweatman HP (2012) Diversity and stability of herbivorous fishes on coral reefs. *Ecology* 93: 891-901.
23. Allesina S, Tang S (2012) Stability criteria for complex ecosystems. *Nature* 483: 205-208.
24. Myers RA, Worm B (2003) Rapid worldwide depletion of predatory fish communities. *Nature* 423: 280-283.
25. Bellwood DR (2003) Origins and escalation of herbivory in fishes: a functional perspective. *Paleobiology* 29: 71-83.
26. Rasher DB, Hoey AS, Hay ME (2013) Consumer diversity interacts with prey defenses to drive ecosystem function. *Ecology* 94: 1347-1358.
27. Burkepile DE, Hay ME (2008) Herbivore species richness and feeding complementarity affect community structure and function on a coral reef. *Proc Nat Acad Sci* 105: 16201-16206.
28. Lirman D (2001) Competition between macroalgae and corals: effects of herbivore exclusion and increased algal biomass on coral survivorship and growth. *Coral Reefs* 19: 392-399.
29. Tanner JE (1995) Competition between scleractinian corals and macroalgae: an experimental investigation of coral growth, survival and reproduction. *J Exp Mar Biol Ecol* 190: 151-168.
30. Moore JC, Berlow EL, Coleman DC, Ruiter PC, Dong Q, et al. (2004) Detritus, trophic dynamics and biodiversity. *Ecol Lett* 7: 584-600.
31. Graham NA, Wilson SK, Jennings S, Polunin NV, Bijoux JP, et al. (2006) Dynamic fragility of oceanic coral reef ecosystems. *Proc Nat Acad Sci* 103: 8425-8429.
32. Alvarez-Filip L, Dulvy NK, Gill JA, Côté IM, Watkinson AR (2009) Flattening of Caribbean coral reefs: region-wide declines in architectural complexity. *Proc Roy Soc B: Biol Sci: rspb20090339*.
33. Almany GR (2004) Differential effects of habitat complexity, predators and competitors on abundance of juvenile and adult coral reef fishes. *Oecologia* 141: 105-113.
34. Wilson S, Fisher R, Pratchett M, Graham N, Dulvy N, et al. (2008) Exploitation and habitat degradation as agents of change within coral reef fish communities. *Glob Change Biol* 14: 2796-2809.
35. Baskett ML, Fabina NS, Gross K (2014) Response Diversity Can Increase Ecological Resilience to Disturbance in Coral Reefs. *Am Nat* 184: E16-E31.
36. Porter JW (1976) Autotrophy, heterotrophy, and resource partitioning in Caribbean reef-building corals. *Am Nat*: 731-742.
37. Meesters E, Hilterman M, Kardinaal E, Keetman M, De Vries M, et al. (2001) Colony size-frequency distributions of scleractinian coral populations: spatial and interspecific variation. *Mar Ecol Prog Ser* 209: 43-54.
