# Supplementary material for: The Micronesia Challenge: Assessing the Relative Contribution of Stressors on Coral Reefs to Facilitate Science-to-Management Feedback
Source: PubMed Central journal article supplement (PMC4473011; doi:10.1371/journal.pone.0130823), 2015-06-18
Supplement: pone.0130823.s005.pdf [file pone.0130823.s005.pdf]

Table S2. Site-based characteristics and biological metrics used for data analyses.

| Jurisdiction                                 | Island  | Site    | Local name                  | GPS X   | GPS Y   | Reef type            | MPA Status | Wave Exposure (J/m3) | Distance from major fishing port (km) | Fishing proxy (standardized by strata and combined) | Disturbed land in watershed (km2) | Distance from discharge (km) | Pollution proxy (standardized by strata and combined) |
|----------------------------------------------|---------|---------|-----------------------------|---------|---------|----------------------|------------|----------------------|---------------------------------------|-----------------------------------------------------|-----------------------------------|------------------------------|-------------------------------------------------------|
| Commonwealth of the Northern Mariana Islands | Aguijan | CNMI-1  | AGU_12                      | 342807  | 1642480 | Spur-and-groove      | No         | 629.8                | 38.6                                  | 4.37                                                | 0.04                              | 0.20                         | 2.58                                                  |
| Commonwealth of the Northern Mariana Islands | Rota    | CNMI-10 | ROT_6_12                    | 300459  | 1566145 | Rota raised Holocene | No         | 365.4                | 3.4                                   | 12.61                                               | 0.19                              | 0.18                         | 4.01                                                  |
| Commonwealth of the Northern Mariana Islands | Rota    | CNMI-11 | RR_12                       | 308740  | 1570072 | Rota raised Holocene | No         | 965.3                | 12.8                                  | 3.79                                                | 0.29                              | 0.12                         | 6.51                                                  |
| Commonwealth of the Northern Mariana Islands | Rota    | CNMI-12 | SAHY_12                     | 299569  | 1563743 | Rota raised Holocene | No         | 161.1                | 0.5                                   | 14.37                                               | 0.11                              | 0.18                         | 3.03                                                  |
| Commonwealth of the Northern Mariana Islands | Rota    | CNMI-13 | TALK_12                     | 305271  | 1561044 | Rota raised Holocene | No         | 584.0                | 7.2                                   | 3.56                                                | 0.56                              | 0.22                         | 7.21                                                  |
| Commonwealth of the Northern Mariana Islands | Rota    | CNMI-14 | WHB_12                      | 298271  | 1563772 | Rota raised Holocene | No         | 407.0                | 0.6                                   | 13.63                                               | 0.09                              | 0.39                         | 0.38                                                  |
| Commonwealth of the Northern Mariana Islands | Saipan  | CNMI-2  | BI_12                       | 372724  | 1687351 | Spur-and-groove      | Yes        | 501.2                | 25.6                                  | 7.88                                                | 0.09                              | 0.21                         | 1.47                                                  |
| Commonwealth of the Northern Mariana Islands | Saipan  | CNMI-3  | COP_12                      | 360977  | 1670710 | Spur-and-groove      | No         | 128.7                | 7.42                                  | 13.91                                               | 0.29                              | 0.19                         | 5.47                                                  |
| Commonwealth of the Northern Mariana Islands | Saipan  | CNMI-4  | LLB#1_12                    | 366425  | 1676402 | Spur-and-groove      | No         | 224.3                | 21.4                                  | 10.11                                               | 0.09                              | 0.18                         | 5.48                                                  |
| Commonwealth of the Northern Mariana Islands | Saipan  | CNMI-5  | OBV_12_2                    | 364397  | 1670287 | Spur-and-groove      | No         | 127.8                | 10.9                                  | 13.33                                               | 0.13                              | 0.18                         | 5.85                                                  |
| Commonwealth of the Northern Mariana Islands | Saipan  | CNMI-6  | OGND_12                     | 359633  | 1676634 | Spur-and-groove      | No         | 304.0                | 1.7                                   | 15.65                                               | N/A                               | N/A                          | N/A                                                   |
| Commonwealth of the Northern Mariana Islands | Saipan  | CNMI-7  | TANK_12                     | 369943  | 1678305 | Spur-and-groove      | Yes        | 2530.1               | 27.4                                  | 1.86                                                | 1.16                              | 0.20                         | 7.63                                                  |
| Commonwealth of the Northern Mariana Islands | Saipan  | CNMI-8  | WB_11                       | 370155  | 1688934 | Spur-and-groove      | No         | 360.5                | 15.2                                  | 11.31                                               | N/A                               | N/A                          | N/A                                                   |
| Commonwealth of the Northern Mariana Islands | Tinian  | CNMI-9  | TIN - 1 (12)                | 355222  | 1662018 | Spur-and-groove      | No         | 2215.9               | 14.8                                  | 5.15                                                | 0.04                              | 0.21                         | 1.37                                                  |
| Federated States of Micronesia               | Chuuk   | CHK-1   | Puwe                        | 837023  | 377259  | Patch                | No         | 247.0                | 12.6                                  | 8.94                                                | N/A                               | N/A                          | N/A                                                   |
| Federated States of Micronesia               | Chuuk   | CHK-10  | Fourupw                     | 806821  | 341489  | Channel              | No         | 262.3                | 37.4                                  | 13.76                                               | N/A                               | N/A                          | N/A                                                   |
| Federated States of Micronesia               | Chuuk   | CHK-11  | Wininen                     | 793255  | 384328  | Patch                | No         | 426.5                | 36.2                                  | 1.68                                                | N/A                               | N/A                          | N/A                                                   |
| Federated States of Micronesia               | Chuuk   | CHK-12  | Oun                         | 836404  | 354517  | Channel              | No         | 2021.6               | 21.6                                  | 3.06                                                | N/A                               | N/A                          | N/A                                                   |
| Federated States of Micronesia               | Chuuk   | CHK-13  | Moch                        | 831950  | 386042  | Channel              | No         | 195.6                | 13.8                                  | 14.00                                               | N/A                               | N/A                          | N/A                                                   |
| Federated States of Micronesia               | Chuuk   | CHK-14  | Sapuk                       | 824304  | 379043  | Inner                | No         | 40.0                 | 7.8                                   | 12.50                                               | 0.04                              | 0.58                         | 2.67                                                  |
| Federated States of Micronesia               | Chuuk   | CHK-15  | Apichun                     | 819913  | 378854  | Patch                | No         | 59.9                 | 12.2                                  | 13.44                                               | N/A                               | N/A                          | N/A                                                   |
| Federated States of Micronesia               | Chuuk   | CHK-16  | Manukun                     | 808363  | 375577  | Inner                | No         | 117.9                | 18.2                                  | 7.06                                                | 0.04                              | 0.29                         | 4.31                                                  |
| Federated States of Micronesia               | Chuuk   | CHK-17  | Fanangal                    | 833887  | 368737  | Patch                | No         | 195.0                | 9.9                                   | 10.90                                               | N/A                               | N/A                          | N/A                                                   |
| Federated States of Micronesia               | Chuuk   | CHK-18  | Och                         | 817621  | 361795  | Inner                | No         | 318.8                | 13.1                                  | 6.62                                                | 0.01                              | 0.81                         | 1.31                                                  |
| Federated States of Micronesia               | Chuuk   | CHK-19  | none yet                    | 806077  | 356745  | Inner                | No         | 665.1                | 24.7                                  | 1.56                                                | N/A                               | N/A                          | 4.34                                                  |
| Federated States of Micronesia               | Chuuk   | CHK-2   | Truk Stop                   | 822864  | 371782  | Inner                | No         | 229.7                | 2.9                                   | 12.20                                               | 0.71                              | 0.33                         | 10.60                                                 |
| Federated States of Micronesia               | Chuuk   | CHK-3   | Sanat                       | 800230  | 390961  | Channel              | No         | 157.3                | 32.3                                  | 6.71                                                | N/A                               | N/A                          | N/A                                                   |
| Federated States of Micronesia               | Chuuk   | CHK-4   | Aroch                       | 800578  | 378381  | Patch                | No         | 144.5                | 28.5                                  | 7.60                                                | N/A                               | N/A                          | N/A                                                   |
| Federated States of Micronesia               | Chuuk   | CHK-5   | Oranu                       | 826638  | 344641  | Channel              | No         | 136.7                | 28.7                                  | 6.59                                                | N/A                               | N/A                          | N/A                                                   |
| Federated States of Micronesia               | Chuuk   | CHK-6   | Parem                       | 814354  | 365876  | Inner                | No         | 11.4                 | 11.2                                  | 11.30                                               | 0.07                              | 0.20                         | 5.14                                                  |
| Federated States of Micronesia               | Chuuk   | CHK-7   | Piis                        | 848755  | 365095  | Channel              | No         | 228.0                | 25.3                                  | 9.21                                                | N/A                               | N/A                          | N/A                                                   |
| Federated States of Micronesia               | Chuuk   | CHK-8   | Falos                       | 833313  | 363960  | Patch                | No         | 0.2                  | 11.8                                  | 15.00                                               | N/A                               | N/A                          | N/A                                                   |
| Federated States of Micronesia               | Chuuk   | CHK-9   | Nematon                     | 814047  | 343125  | Inner                | No         | 2.7                  | 40.2                                  | 15.54                                               | 0.07                              | 0.92                         | 0.87                                                  |
| Federated States of Micronesia               | Kosrae  | KOS-1   | Buoy-16                     | 582358  | 276178  | Outer                | No         | 127.5                | 2.6                                   | 14.96                                               | 0.11                              | 0.25                         | 5.06                                                  |
| Federated States of Micronesia               | Kosrae  | KOS-3   | Buoy-8                      | 584519  | 281554  | Outer                | No         | 2382.2               | 6.9                                   | 3.96                                                | 0.20                              | 1.27                         | 1.73                                                  |
| Federated States of Micronesia               | Kosrae  | KOS-4   | Buoy-T5                     | 591012  | 272464  | Outer                | No         | 122.0                | 2.1                                   | 15.62                                               | 0.47                              | 1.49                         | 1.12                                                  |
| Federated States of Micronesia               | Kosrae  | KOS-5   | Buoy-44                     | 553424  | 167286  | Outer                | No         | 813.0                | 4.1                                   | 10.73                                               | 0.36                              | 0.63                         | 7.12                                                  |
| Federated States of Micronesia               | Kosrae  | KOS-6   | Buoy-50                     | 553002  | 278247  | Outer                | No         | 2372.3               | 6.1                                   | 4.41                                                | 0.09                              | 0.35                         | 4.33                                                  |
| Federated States of Micronesia               | Kosrae  | KOS-7   | Buoy-20                     | 582503  | 273344  | Outer                | No         | 239.8                | 2.1                                   | 15.14                                               | 0.04                              | 0.65                         | 2.63                                                  |
| Federated States of Micronesia               | Kosrae  | KOS-2   | Buoy-27                     | 585054  | 267521  | Outer                | No         | 156.8                | 11.2                                  | 3.95                                                | 0.01                              | 0.68                         | 2.18                                                  |
| Federated States of Micronesia               | Kosrae  | KOS-8   | Buoy-53                     | 590883  | 281512  | Outer                | No         | 2388.2               | 4.2                                   | 5.38                                                | N/A                               | N/A                          | N/A                                                   |
| Federated States of Micronesia               | Kosrae  | KOS-9   | Buoy-14                     | 581642  | 277193  | Outer                | No         | 788.6                | 5.3                                   | 9.55                                                | 0.19                              | 0.20                         | 6.85                                                  |
| Federated States of Micronesia               | Kosrae  | KOS-10  | Buoy-31                     | 587580  | 267346  | Outer                | No         | 200.4                | 8.8                                   | 6.91                                                | 0.01                              | 0.98                         | 1.48                                                  |
| Federated States of Micronesia               | Pohnpei | PNI-1   | Sapwitik MPA Inner Reef     | 774869  | 414498  | Inner                | Yes        | 33.6                 | 5.74                                  | 7.44                                                | 4.64                              | 5.16                         | 4.55                                                  |
| Federated States of Micronesia               | Pohnpei | PNI-9   | Pearem patch reef           | 773142  | 419563  | Inner                | No         | 39.3                 | 12.9                                  | 5.20                                                | 0.18                              | 3.55                         | 2.16                                                  |
| Federated States of Micronesia               | Pohnpei | PNI-10  | Black Coral                 | 751750  | 401833  | Outer                | Yes        | 151.4                | 31.1                                  | 9.99                                                | N/A                               | N/A                          | N/A                                                   |
| Federated States of Micronesia               | Pohnpei | PNI-11  | Laiap Island                | 749443  | 410766  | Inner                | Yes        | 6.8                  | 37.8                                  | 7.21                                                | 0.30                              | 2.74                         | 2.74                                                  |
| Federated States of Micronesia               | Pohnpei | PNI-2   | Palikir Channel             | 771437  | 403790  | Inner                | No         | 23.9                 | 11.2                                  | 9.24                                                | 0.71                              | 6.84                         | 0.62                                                  |
| Federated States of Micronesia               | Pohnpei | PNI-12  | Nahtik Inner                | 749411  | 413314  | Inner                | No         | 2.2                  | 40.9                                  | 7.03                                                | 0.39                              | 2.12                         | 3.23                                                  |
| Federated States of Micronesia               | Pohnpei | PNI-13  | Nan Mwokil                  | 748516  | 417939  | Inner                | No         | 0.3                  | 45.3                                  | 6.07                                                | 0.43                              | 4.14                         | 2.11                                                  |
| Federated States of Micronesia               | Pohnpei | PNI-14  | Nan Pwin                    | 751234  | 424215  | Outer                | No         | 2403.0               | 53.1                                  | 2.38                                                | 0.35                              | 2.48                         | N/A                                                   |
| Federated States of Micronesia               | Pohnpei | PNI-15  | Nan Wap Outer               | 759729  | 429066  | Outer                | Yes        | 2367.0               | 32.9                                  | 4.87                                                | 2.78                              | 7.63                         | N/A                                                   |
| Federated States of Micronesia               | Pohnpei | PNI-16  | Nan Wap Inner               | 759707  | 427638  | Inner                | Yes        | 2.8                  | 35.7                                  | 8.28                                                | 2.78                              | 5.30                         | 3.04                                                  |
| Federated States of Micronesia               | Pohnpei | PNI-17  | Madamken                    | 768932  | 426178  | Outer                | No         | 2367.9               | 23.6                                  | 6.00                                                | N/A                               | N/A                          | N/A                                                   |
| Federated States of Micronesia               | Pohnpei | PNI-3   | Palikir Inner Reef (Mwahng) | 769443  | 405093  | Inner                | No         | 5.2                  | 11.7                                  | 13.85                                               | 0.07                              | 2.03                         | 2.76                                                  |
| Federated States of Micronesia               | Pohnpei | PNI-4   | Main Channel (Sokehs)       | 773711  | 409658  | Outer                | No         | 24.4                 | 5.4                                   | 16.56                                               | 4.59                              | 5.23                         | N/A                                                   |
| Federated States of Micronesia               | Pohnpei | PNI-5   | Nan Mveli Outer Reef        | 779036  | 414985  | Outer                | No         | 288.1                | 9.9                                   | 14.58                                               | N/A                               | N/A                          | N/A                                                   |
| Federated States of Micronesia               | Pohnpei | PNI-6   | Pwukihn Dawahk Outer Reef   | 768618  | 399166  | Outer                | No         | 220.5                | 18.8                                  | 12.72                                               | N/A                               | N/A                          | N/A                                                   |
| Federated States of Micronesia               | Pohnpei | PNI-7   | Pehleng Channel             | 758640  | 401697  | Inner                | No         | 29.9                 | 24.1                                  | 5.97                                                | 2.52                              | 5.51                         | 2.62                                                  |
| Federated States of Micronesia               | Pohnpei | PNI-8   | Mwahnd MPA Inner Reef       | 774875  | 422339  | Inner                | Yes        | 1.7                  | 14.1                                  | 14.10                                               | 0.18                              | 6.23                         | 0.79                                                  |
| Federated States of Micronesia               | Yap     | YAP-1   | Atliw                       | 1058744 | 181245  | Outer                | No         | 839.5                | 19.9                                  | 10.26                                               | 0.14                              | 1.23                         | N/A                                                   |
| Federated States of Micronesia               | Yap     | YAP-9   | Gafnuw Channel              | 1059013 | 192630  | Channel              | No         | 202.4                | 19.6                                  | 5.30                                                | 1.61                              | 3.20                         | 1.77                                                  |
| Federated States of Micronesia               | Yap     | YAP-10  | Mil Inner Reef              | 1063528 | 185988  | Inner                | No         | 19.0                 | 11.4                                  | 4.77                                                | 0.19                              | 1.56                         | 2.10                                                  |
| Federated States of Micronesia               | Yap     | YAP-11  | Pakel                       | 1054712 | 184646  | Inner                | No         | 1.1                  | 3.1                                   | 14.10                                               | 1.32                              | 1.67                         | 3.60                                                  |

| Jurisdiction                     | Island  | Site   | Local name        | GPS X   | GPS Y  | Reef type | MPA Status | Wave Exposure (1/m3) | Distance from major fishing port (km) | Fishing proxy (standardized by strata and combined) | Disturbed land in watershed (km2) | Distance from discharge (km) | Pollution proxy (standardized by strata and combined) |
|----------------------------------|---------|--------|-------------------|---------|--------|-----------|------------|----------------------|---------------------------------------|-----------------------------------------------------|-----------------------------------|------------------------------|-------------------------------------------------------|
| Federated States of Micronesia   | Yap     | YAP-12 | Toruw             | 1063860 | 191153 | Outer     | No         | 1772.1               | 22.6                                  | 4.42                                                | N/A                               | N/A                          | N/A                                                   |
| Federated States of Micronesia   | Yap     | YAP-14 | Nimpal Channel    | 1056509 | 179732 | Channel   | Yes        | 243.2                | 21.2                                  | 4.09                                                | 0.18                              | 0.94                         | 1.21                                                  |
| Federated States of Micronesia   | Yap     | YAP-2  | Gachug            | 1053766 | 178195 | Channel   | No         | 6.6                  | 23.7                                  | 7.48                                                | 0.98                              | 1.39                         | 4.86                                                  |
| Federated States of Micronesia   | Yap     | YAP-3  | N'ef Blue Hole    | 1048969 | 176663 | Inner     | No         | 8.1                  | 26.1                                  | 4.69                                                | 0.02                              | 0.72                         | 4.06                                                  |
| Federated States of Micronesia   | Yap     | YAP-4  | Reey Outer Reef   | 1048630 | 175506 | Outer     | Yes        | 808.8                | 24.1                                  | 7.83                                                | N/A                               | N/A                          | N/A                                                   |
| Federated States of Micronesia   | Yap     | YAP-5  | Af Blue Hole      | 1052437 | 186614 | Inner     | No         | 2.1                  | 3.1                                   | 13.66                                               | 0.00                              | 0.71                         | 4.02                                                  |
| Federated States of Micronesia   | Yap     | YAP-6  | Gabach Channel    | 1049852 | 183837 | Channel   | No         | 0.9                  | 5.2                                   | 16.44                                               | 1.33                              | 2.45                         | 3.57                                                  |
| Federated States of Micronesia   | Yap     | YAP-7  | Garim             | 1045326 | 179338 | Outer     | No         | 1830.4               | 11.6                                  | 7.39                                                | N/A                               | N/A                          | N/A                                                   |
| Federated States of Micronesia   | Yap     | YAP-8  | Pelak Channel     | 1053411 | 190363 | Channel   | No         | 1.8                  | 10.7                                  | 13.78                                               | 1.14                              | 1.64                         | 5.02                                                  |
| Federated States of Micronesia   | Yap     | Yap-15 | Rumong outer reef | 1067126 | 186067 | Outer     | No         | 1064.4               | 16.26                                 | 11.02                                               | N/A                               | N/A                          | N/A                                                   |
| Federated States of Micronesia   | Yap     | Yap-13 | Af outer reef     | 1050819 | 187756 | Outer     | Yes        | 1647.0               | 7.1                                   | 10.44                                               | N/A                               | N/A                          | N/A                                                   |
| Republic of the Marshall Islands | Namdrik | NAM-1  | Nam-1             | 618775  | 178446 | Outer     | No         | 253.3                | 1.6                                   | 15.66                                               | 0.00                              | 0.46                         | 1.02                                                  |
| Republic of the Marshall Islands | Namdrik | NAM-2  | Nam-2             | 618469  | 180888 | Outer     | No         | 785.2                | 3.9                                   | 11.12                                               | 0.00                              | 0.30                         | -0.04                                                 |
| Republic of the Marshall Islands | Namdrik | NAM-3  | Nam-3             | 623866  | 180412 | Outer     | No         | 2270.6               | 9.1                                   | 3.17                                                | 0.00                              | 0.74                         | -0.66                                                 |
| Republic of the Marshall Islands | Namdrik | NAM-4  | Nam-4             | 623966  | 177201 | Outer     | No         | 63.6                 | 4.6                                   | 12.39                                               | N/A                               | N/A                          | -0.19                                                 |
| Republic of the Marshall Islands | Namdrik | NAM-5  | Nam-6             | 621759  | 182159 | Outer     | No         | 2659.0               | 8.3                                   | 3.03                                                | 0.00                              | 0.24                         | 0.32                                                  |
| Republic of the Marshall Islands | Namdrik | NAM-6  | Nam-7             | 618506  | 180399 | Outer     | No         | 288.9                | 3.5                                   | 13.14                                               | 0.00                              | 0.25                         | 0.73                                                  |

| Island  | site    | benthic ratio | coral evenness (Shannon H) | coral cover | macroalgae cover |
|---------|---------|---------------|----------------------------|-------------|------------------|
| Aguijan | CNMI-1  | 1.29          | 2.29                       | 35.28       | 2.72             |
| Rota    | CNMI-10 | 0.50          | 1.74                       | 9.04        | 20.34            |
| Rota    | CNMI-11 | 0.86          | 1.03                       | 9.14        | 20.39            |
| Rota    | CNMI-12 | 0.42          | 1.92                       | 6.73        | 13.36            |
| Rota    | CNMI-13 | 0.46          | 1.84                       | 6.32        | 7.17             |
| Rota    | CNMI-14 | 0.22          | 1.75                       | 5.64        | 6.73             |
| Saipan  | CNMI-2  | 1.27          | 2.48                       | 36.60       | 6.00             |
| Saipan  | CNMI-3  | 0.79          | 2.23                       | 30.32       | 1.79             |
| Saipan  | CNMI-4  | 0.31          | 2.06                       | 5.76        | 6.46             |
| Saipan  | CNMI-5  | 1.74          | 2.16                       | 24.28       | 3.91             |
| Saipan  | CNMI-6  | 1.55          | 2.40                       | 24.06       | 6.80             |
| Saipan  | CNMI-7  | 1.20          | 2.61                       | 38.39       | 0.74             |
| Saipan  | CNMI-8  | 0.88          | 2.02                       | 21.46       | 6.40             |
| Tinian  | CNMI-9  | 1.60          | 2.38                       | 35.36       | 2.16             |
| Chuuk   | CHK-1   | 1.00          | 0.77                       | 31.04       | 24.30            |
| Chuuk   | CHK-10  | 1.71          | 1.50                       | 38.52       | 17.73            |
| Chuuk   | CHK-11  | 0.79          | 1.05                       | 19.49       | 31.38            |
| Chuuk   | CHK-12  | 2.07          | 1.70                       | 35.10       | 15.92            |
| Chuuk   | CHK-13  | 1.20          | 1.25                       | 27.36       | 9.52             |
| Chuuk   | CHK-14  | 2.48          | 0.42                       | 32.82       | 5.31             |
| Chuuk   | CHK-15  | 0.51          | 0.59                       | 4.08        | 39.97            |
| Chuuk   | CHK-16  | 1.71          | 1.20                       | 30.42       | 6.42             |
| Chuuk   | CHK-17  | 1.43          | 1.58                       | 32.40       | 18.32            |
| Chuuk   | CHK-18  | 1.88          | 1.25                       | 24.16       | 4.65             |
| Chuuk   | CHK-19  | 2.00          | 1.26                       | 28.75       | 19.67            |
| Chuuk   | CHK-2   | 1.44          | 0.66                       | 26.48       | 17.78            |
| Chuuk   | CHK-3   | 2.27          | 0.53                       | 27.62       | 12.90            |
| Chuuk   | CHK-4   | 1.31          | 0.96                       | 30.00       | 9.04             |
| Chuuk   | CHK-5   | 3.11          | 1.54                       | 38.90       | 2.37             |
| Chuuk   | CHK-6   | 0.70          | 0.61                       | 21.28       | 30.16            |
| Chuuk   | CHK-7   | 1.94          | 1.31                       | 38.88       | 16.62            |
| Chuuk   | CHK-8   | 1.06          | 1.41                       | 17.60       | 21.68            |
| Chuuk   | CHK-9   | 1.00          | 1.14                       | 28.40       | 32.40            |
| Kosrae  | KOS-1   | 3.18          | 1.85                       | 66.72       | 7.04             |
| Kosrae  | KOS-3   | 1.85          | 1.47                       | 44.12       | 4.72             |
| Kosrae  | KOS-4   | 1.21          | 1.61                       | 41.55       | 9.85             |
| Kosrae  | KOS-5   | 0.76          | 2.18                       | 16.03       | 6.33             |
| Kosrae  | KOS-6   | 2.28          | 1.65                       | 51.04       | 3.20             |
| Kosrae  | KOS-7   | 0.56          | 2.06                       | 20.64       | 24.48            |
| Kosrae  | KOS-2   | 2.56          | 1.97                       | 62.76       | 9.69             |
| Kosrae  | KOS-8   | 2.43          | 1.73                       | 48.00       | 2.40             |
| Kosrae  | KOS-9   | 1.86          | 2.20                       | 46.03       | 5.52             |

| Island  | site   | benthic ratio | coral evenness (Shannon H) | coral cover | macroalgae cover |
|---------|--------|---------------|----------------------------|-------------|------------------|
| Kosrae  | KOS-10 | 1.92          | 1.96                       | 50.24       | 3.84             |
| Pohnpei | PNI-1  | 3.33          | 1.42                       | 44.24       | 0.00             |
| Pohnpei | PNI-9  | 1.91          | 1.49                       | 42.46       | 0.64             |
| Pohnpei | PNI-10 | 2.50          | 1.26                       | 15.68       | 15.92            |
| Pohnpei | PNI-11 | 0.50          | 1.44                       | 23.50       | 1.92             |
| Pohnpei | PNI-2  | 1.38          | 1.40                       | 35.52       | 1.68             |
| Pohnpei | PNI-12 | 1.17          | 1.89                       | 25.76       | 1.04             |
| Pohnpei | PNI-13 | 2.88          | 2.42                       | 53.99       | 1.92             |
| Pohnpei | PNI-14 | 3.86          | 1.86                       | 18.72       | 19.04            |
| Pohnpei | PNI-15 | 3.00          | 1.52                       | 8.72        | 19.60            |
| Pohnpei | PNI-16 | 1.76          | 1.32                       | 57.68       | 5.92             |
| Pohnpei | PNI-17 | 1.29          | 1.74                       | 23.60       | 9.36             |
| Pohnpei | PNI-3  | 3.72          | 1.51                       | 39.28       | 0.72             |
| Pohnpei | PNI-4  | 1.30          | 1.65                       | 8.53        | 29.44            |
| Pohnpei | PNI-5  | 1.97          | 1.84                       | 12.80       | 0.48             |
| Pohnpei | PNI-6  | 1.94          | 1.48                       | 21.76       | 6.56             |
| Pohnpei | PNI-7  | 2.85          | 1.60                       | 36.72       | 2.88             |
| Pohnpei | PNI-8  | 4.63          | 1.64                       | 52.88       | 0.08             |
| Yap     | YAP-1  | 3.60          | 1.87                       | 49.04       | 0.64             |
| Yap     | YAP-9  | 5.17          | 1.73                       | 61.76       | 0.00             |
| Yap     | YAP-10 | 3.14          | 1.06                       | 63.20       | 0.00             |
| Yap     | YAP-11 | 3.39          | 1.14                       | 54.48       | 0.00             |
| Yap     | YAP-12 | 2.58          | 2.25                       | 25.04       | 0.00             |
| Yap     | YAP-14 | 5.65          | 1.63                       | 54.16       | 0.08             |
| Yap     | YAP-2  | 5.75          | 1.59                       | 65.52       | 1.36             |
| Yap     | YAP-3  | 5.51          | 0.82                       | 64.16       | 0.00             |
| Yap     | YAP-4  | 1.95          | 2.21                       | 31.04       | 0.32             |
| Yap     | YAP-5  | 4.15          | 0.58                       | 43.84       | 0.08             |
| Yap     | YAP-6  | 2.60          | 0.99                       | 48.48       | 3.44             |
| Yap     | YAP-7  | 2.55          | 1.80                       | 29.68       | 0.48             |
| Yap     | YAP-8  | 3.00          | 1.96                       | 49.60       | 0.00             |
| Yap     | Yap-15 | 3.59          | 1.62                       | 30.53       | 0.17             |
| Yap     | Yap-13 | 1.38          | 1.95                       | 12.16       | 0.00             |
| Namdrik | NAM-1  | 5.29          | 1.86                       | 48.24       | 10.08            |
| Namdrik | NAM-2  | 5.12          | 2.10                       | 35.68       | 4.88             |
| Namdrik | NAM-3  | 13.78         | 1.37                       | 58.53       | 1.06             |
| Namdrik | NAM-4  | 2.87          | 1.78                       | 37.71       | 21.61            |
| Namdrik | NAM-5  | 9.43          | 1.79                       | 65.02       | 4.81             |
| Namdrik | NAM-6  | 4.91          | 2.06                       | 28.42       | 11.50            |

| Island  | Site    | fish assem size (cm) | fish ass biomass (kg/SPC) | predator biomass (kg/SPC) | fish heterogeneity (% dissimilarity) | fish evenness (Shannon H) |
|---------|---------|----------------------|---------------------------|---------------------------|--------------------------------------|---------------------------|
| Aguijan | CNMI-1  | 15.98                | 2.71                      | 0.51                      | 45.81                                | 2.80                      |
| Rota    | CNMI-10 | 11.98                | 0.95                      | 0.07                      | 47.56                                | 2.21                      |
| Rota    | CNMI-11 | 14.23                | 7.44                      | 0.12                      | 54.34                                | 0.78                      |
| Rota    | CNMI-12 | 14.69                | 2.57                      | 1.26                      | 45.31                                | 2.23                      |
| Rota    | CNMI-13 | 13.44                | 1.78                      | 0.03                      | 51.49                                | 2.71                      |
| Rota    | CNMI-14 | 11.84                | 1.00                      | 0.04                      | 41.09                                | 1.88                      |
| Saipan  | CNMI-2  | 14.24                | 2.27                      | 0.11                      | 43.26                                | 2.62                      |
| Saipan  | CNMI-3  | 10.15                | 0.51                      | 0.00                      | 41.52                                | 1.95                      |
| Saipan  | CNMI-4  | 10.02                | 0.84                      | 0.68                      | 38.92                                | 1.80                      |
| Saipan  | CNMI-5  | 11.02                | 2.44                      | 0.05                      | 41.95                                | 2.40                      |
| Saipan  | CNMI-6  | 8.92                 | 0.42                      | 0.00                      | 32.87                                | 1.66                      |
| Saipan  | CNMI-7  | 14.60                | 0.90                      | 0.06                      | 30.04                                | 0.98                      |
| Saipan  | CNMI-8  | 10.91                | 2.80                      | 0.10                      | 38.23                                | 2.22                      |
| Tinian  | CNMI-9  | 13.67                | 0.78                      | 0.01                      | 38.75                                | 1.56                      |
| Chuuk   | CHK-1   | 12.36                | 1.32                      | 2.22                      | 47.18                                | 2.09                      |
| Chuuk   | CHK-10  | 13.18                | 2.89                      | 5.69                      | 51.18                                | 1.90                      |
| Chuuk   | CHK-11  | 21.64                | 10.91                     | 4.36                      | 49.01                                | 2.79                      |
| Chuuk   | CHK-12  | 22.84                | 16.67                     | 82.01                     | 36.16                                | 2.39                      |
| Chuuk   | CHK-13  | 18.70                | 5.75                      | 3.01                      | 52.63                                | 2.73                      |
| Chuuk   | CHK-14  | 16.60                | 4.04                      | 0.10                      | 48.50                                | 2.68                      |
| Chuuk   | CHK-15  | 14.72                | 4.73                      | 2.58                      | 50.60                                | 2.56                      |
| Chuuk   | CHK-16  | 14.41                | 2.01                      | 0.01                      | 57.93                                | 2.42                      |
| Chuuk   | CHK-17  | 18.75                | 9.43                      | 68.23                     | 34.43                                | 1.83                      |
| Chuuk   | CHK-18  | 14.77                | 4.04                      | 3.99                      | 49.84                                | 2.22                      |
| Chuuk   | CHK-19  | 19.22                | 8.48                      | 29.98                     | 51.31                                | 2.27                      |
| Chuuk   | CHK-2   | 9.54                 | 0.45                      | 0.00                      | 36.21                                | 1.81                      |
| Chuuk   | CHK-3   | 14.83                | 3.47                      | 0.18                      | 53.59                                | 2.64                      |
| Chuuk   | CHK-4   | 12.49                | 1.19                      | 0.97                      | 46.27                                | 1.98                      |
| Chuuk   | CHK-5   | 18.87                | 6.66                      | 45.83                     | 17.11                                | 2.16                      |
| Chuuk   | CHK-6   | 9.76                 | 0.48                      | 0.00                      | 34.04                                | 1.66                      |
| Chuuk   | CHK-7   | 13.17                | 3.86                      | 9.08                      | 56.31                                | 2.11                      |
| Chuuk   | CHK-8   | 14.25                | 2.39                      | 1.41                      | 59.59                                | 2.43                      |
| Chuuk   | CHK-9   | 17.01                | 5.78                      | 19.44                     | 47.36                                | 2.22                      |
| Kosrae  | KOS-1   | 16.87                | 3.02                      | 0.07                      | 47.95                                | 2.69                      |
| Kosrae  | KOS-3   | 15.45                | 4.07                      | 0.03                      | 34.56                                | 2.64                      |
| Kosrae  | KOS-4   | 16.83                | 4.04                      | 0.03                      | 40.99                                | 2.57                      |
| Kosrae  | KOS-5   | 15.52                | 3.11                      | 0.27                      | 47.24                                | 3.11                      |
| Kosrae  | KOS-6   | 15.63                | 4.01                      | 0.08                      | 39.51                                | 2.76                      |
| Kosrae  | KOS-7   | 14.11                | 2.50                      | 0.05                      | 39.31                                | 2.81                      |
| Kosrae  | KOS-2   | 16.47                | 3.14                      | 0.16                      | 46.35                                | 3.03                      |
| Kosrae  | KOS-8   | 17.82                | 6.79                      | 0.25                      | 46.75                                | 2.82                      |
| Kosrae  | KOS-9   | 16.29                | 4.06                      | 0.02                      | 42.90                                | 2.90                      |
| Kosrae  | KOS-10  | 15.23                | 1.99                      | 0.04                      | 39.70                                | 2.80                      |
| Pohnpei | PNI-1   | 11.97                | 1.54                      | 0.01                      | 42.67                                | 2.54                      |
| Pohnpei | PNI-9   | 15.89                | 2.76                      | 0.38                      | 39.43                                | 2.65                      |
| Pohnpei | PNI-10  | 17.83                | 6.36                      | 0.28                      | 43.07                                | 2.81                      |
| Pohnpei | PNI-11  | 14.31                | 1.72                      | 0.17                      | 38.85                                | 2.57                      |
| Pohnpei | PNI-2   | 12.48                | 1.84                      | 1.22                      | 50.61                                | 2.70                      |
| Pohnpei | PNI-12  | 17.60                | 3.20                      | 0.43                      | 50.54                                | 3.13                      |
| Pohnpei | PNI-13  | 15.00                | 1.64                      | 0.00                      | 41.72                                | 2.46                      |
| Pohnpei | PNI-14  | 17.44                | 12.31                     | 0.14                      | 38.49                                | 2.46                      |
| Pohnpei | PNI-15  | 21.94                | 34.70                     | 1.71                      | 42.22                                | 2.74                      |
| Pohnpei | PNI-16  | 19.85                | 7.92                      | 0.40                      | 51.18                                | 2.62                      |
| Pohnpei | PNI-17  | 17.79                | 8.73                      | 0.51                      | 40.46                                | 2.71                      |
| Pohnpei | PNI-3   | 13.08                | 1.45                      | 0.09                      | 48.47                                | 2.77                      |
| Pohnpei | PNI-4   | 11.28                | 2.11                      | 0.02                      | 45.30                                | 2.45                      |
| Pohnpei | PNI-5   | 12.16                | 2.77                      | 0.04                      | 33.09                                | 2.46                      |
| Pohnpei | PNI-6   | 12.72                | 5.21                      | 0.18                      | 44.96                                | 2.97                      |
| Pohnpei | PNI-7   | 13.50                | 2.68                      | 0.32                      | 49.33                                | 2.05                      |
| Pohnpei | PNI-8   | 12.11                | 1.32                      | 0.04                      | 46.68                                | 2.76                      |
| Yap     | YAP-1   | 11.36                | 2.14                      | 0.14                      | 43.65                                | 2.08                      |
| Yap     | YAP-9   | 14.00                | 1.80                      | 0.22                      | 55.21                                | 2.22                      |
| Yap     | YAP-10  | 10.33                | 0.65                      | 0.00                      | 37.85                                | 1.75                      |
| Yap     | YAP-11  | 7.86                 | 0.37                      | 0.13                      | 55.85                                | 1.73                      |
| Yap     | YAP-12  | 11.22                | 1.75                      | 0.39                      | 54.83                                | 2.35                      |
| Yap     | YAP-14  | 14.29                | 2.02                      | 0.93                      | 50.00                                | 2.13                      |
| Yap     | YAP-2   | 13.15                | 1.46                      | 0.06                      | 40.56                                | 2.33                      |
| Yap     | YAP-3   | 9.85                 | 0.34                      | 0.02                      | 53.40                                | 2.05                      |

| Island  | Site   | fish assem size (cm) | fish ass biomass (kg/SPC) | predator biomass (kg/SPC) | fish heterogeneity (% dissimilarity) | fish evenness (Shannon H) |
|---------|--------|----------------------|---------------------------|---------------------------|--------------------------------------|---------------------------|
| Yap     | YAP-4  | 13.10                | 2.15                      | 0.80                      | 47.19                                | 1.96                      |
| Yap     | YAP-5  | 9.71                 | 0.51                      | 0.07                      | 36.02                                | 1.73                      |
| Yap     | YAP-6  | 12.87                | 3.66                      | 0.40                      | 52.43                                | 2.58                      |
| Yap     | YAP-7  | 13.11                | 4.79                      | 1.23                      | 48.72                                | 2.66                      |
| Yap     | YAP-8  | 10.87                | 1.09                      | 0.40                      | 34.45                                | 1.90                      |
| Yap     | Yap-15 | 14.98                | 2.52                      | 0.36                      | 57.59                                | 2.93                      |
| Yap     | Yap-13 | 13.28                | 4.81                      | 0.48                      | 46.86                                | 2.93                      |
| Namdrik | NAM-1  | 19.24                | 4.23                      | 1.82                      | 53.13                                | 2.46                      |
| Namdrik | NAM-2  | 19.48                | 6.27                      | 2.78                      | 56.19                                | 2.89                      |
| Namdrik | NAM-3  | 19.04                | 5.77                      | 7.52                      | 48.34                                | 2.74                      |
| Namdrik | NAM-4  | 22.41                | 8.58                      | 4.75                      | 52.60                                | 2.61                      |
| Namdrik | NAM-5  | 17.24                | 3.75                      | 1.56                      | 49.72                                | 2.91                      |
| Namdrik | NAM-6  | 16.46                | 2.95                      | 5.29                      | 44.79                                | 1.99                      |

| Island  | Site    | coral skewness | coral heterogeneity (% dissimilarity) | species richness | coral evenness (Shannon H) |
|---------|---------|----------------|---------------------------------------|------------------|----------------------------|
| Aguijan | CNMI-1  | 2.53           | 65.91                                 | 6.50             | 3.30                       |
| Rota    | CNMI-10 | 4.37           | 54.56                                 | 6.94             | 2.53                       |
| Rota    | CNMI-11 | 2.72           | 50.84                                 | 5.27             | 1.22                       |
| Rota    | CNMI-12 | 1.73           | 59.93                                 | 5.88             | 2.63                       |
| Rota    | CNMI-13 | 2.43           | 62.13                                 | 4.38             | 2.41                       |
| Rota    | CNMI-14 | 1.68           | 61.10                                 | 5.88             | 2.82                       |
| Saipan  | CNMI-2  | 4.14           | 56.79                                 | 10.00            | 3.14                       |
| Saipan  | CNMI-3  | 2.34           | 56.78                                 | 8.75             | 3.04                       |
| Saipan  | CNMI-4  | 2.74           | 58.27                                 | 7.19             | 2.91                       |
| Saipan  | CNMI-5  | 2.99           | 60.25                                 | 8.56             | 2.96                       |
| Saipan  | CNMI-6  | 3.91           | 64.19                                 | 5.81             | 3.10                       |
| Saipan  | CNMI-7  | 3.74           | 61.02                                 | 6.56             | 2.88                       |
| Saipan  | CNMI-8  | 2.60           | 59.50                                 | 7.44             | 3.00                       |
| Tinian  | CNMI-9  | 2.68           | 61.90                                 | 8.13             | 3.30                       |
| Chuuk   | CHK-1   | 3.86           | 54.80                                 | 4.20             | 1.70                       |
| Chuuk   | CHK-10  | 3.17           | 45.94                                 | 7.90             | 2.00                       |
| Chuuk   | CHK-11  | NA             | NA                                    | NA               | NA                         |
| Chuuk   | CHK-12  | NA             | NA                                    | NA               | NA                         |
| Chuuk   | CHK-13  | NA             | NA                                    | NA               | NA                         |
| Chuuk   | CHK-14  | NA             | NA                                    | NA               | NA                         |
| Chuuk   | CHK-15  | NA             | NA                                    | NA               | NA                         |
| Chuuk   | CHK-16  | NA             | NA                                    | NA               | NA                         |
| Chuuk   | CHK-17  | NA             | NA                                    | NA               | NA                         |
| Chuuk   | CHK-18  | NA             | NA                                    | NA               | NA                         |
| Chuuk   | CHK-19  | NA             | NA                                    | NA               | NA                         |
| Chuuk   | CHK-2   | 2.30           | 55.06                                 | 2.40             | 1.22                       |
| Chuuk   | CHK-3   | 3.60           | 50.99                                 | 6.80             | 1.45                       |
| Chuuk   | CHK-4   | 6.60           | 60.99                                 | 7.20             | 1.99                       |
| Chuuk   | CHK-5   | 4.12           | 51.77                                 | 9.20             | 2.31                       |
| Chuuk   | CHK-6   | 4.20           | 50.33                                 | 2.50             | 1.15                       |
| Chuuk   | CHK-7   | 2.54           | 54.25                                 | 6.00             | 2.09                       |
| Chuuk   | CHK-8   | 3.30           | 61.20                                 | 4.40             | 1.81                       |
| Chuuk   | CHK-9   | 3.00           | 53.39                                 | 2.60             | 1.36                       |
| Kosrae  | KOS-1   | 3.82           | 57.66                                 | 5.40             | 2.57                       |
| Kosrae  | KOS-3   | 2.89           | 61.20                                 | 3.50             | 1.89                       |
| Kosrae  | KOS-4   | 5.29           | 48.75                                 | 8.80             | 2.28                       |
| Kosrae  | KOS-5   | 4.37           | 53.98                                 | 9.10             | 2.48                       |
| Kosrae  | KOS-6   | 4.10           | 58.74                                 | 4.90             | 2.34                       |
| Kosrae  | KOS-7   | 3.93           | 61.17                                 | 5.60             | 2.33                       |
| Kosrae  | KOS-2   | 3.61           | 58.06                                 | 7.40             | 2.65                       |
| Kosrae  | KOS-8   | 1.99           | 50.21                                 | 11.30            | 2.83                       |
| Kosrae  | KOS-9   | 3.66           | 62.09                                 | 5.10             | 2.74                       |
| Kosrae  | KOS-10  | 3.51           | 52.82                                 | 6.60             | 2.33                       |
| Pohnpei | PNI-1   | 3.32           | 51.72                                 | 5.70             | 1.66                       |
| Pohnpei | PNI-9   | 4.40           | 29.60                                 | 6.20             | 1.84                       |
| Pohnpei | PNI-10  | 4.65           | 48.99                                 | 7.90             | 1.73                       |
| Pohnpei | PNI-11  | 2.58           | 48.19                                 | 4.70             | 1.75                       |
| Pohnpei | PNI-2   | 4.50           | 52.13                                 | 5.30             | 1.49                       |
| Pohnpei | PNI-12  | 4.84           | 53.27                                 | 5.40             | 1.61                       |
| Pohnpei | PNI-13  | 2.55           | 58.86                                 | 9.90             | 3.01                       |
| Pohnpei | PNI-14  | 2.58           | 60.11                                 | 5.50             | 2.26                       |



| Island  | Site   | coral skewness | coral heterogeneity (% dissimilarity) | species richness | coral evenness (Shannon H) |
|---------|--------|----------------|---------------------------------------|------------------|----------------------------|
| Pohnpei | PNI-15 | 1.37           | 61.38                                 | 6.60             | 2.61                       |
| Pohnpei | PNI-16 | 2.39           | 29.16                                 | 3.90             | 1.34                       |
| Pohnpei | PNI-17 | 2.50           | 56.73                                 | 7.40             | 2.08                       |
| Pohnpei | PNI-3  | 4.73           | 40.04                                 | 3.60             | 1.20                       |
| Pohnpei | PNI-4  | 3.20           | 50.00                                 | 5.60             | 1.63                       |
| Pohnpei | PNI-5  | 2.79           | 46.61                                 | 9.70             | 2.15                       |
| Pohnpei | PNI-6  | 2.70           | 42.39                                 | 8.80             | 1.48                       |
| Pohnpei | PNI-7  | 5.16           | 44.84                                 | 7.20             | 1.60                       |
| Pohnpei | PNI-8  | 4.37           | 40.34                                 | 6.70             | 1.68                       |
| Yap     | YAP-1  | 1.45           | 51.71                                 | 8.20             | 2.60                       |
| Yap     | YAP-9  | 4.45           | 56.56                                 | 7.25             | 2.48                       |
| Yap     | YAP-10 | 4.92           | 45.70                                 | 6.50             | 1.68                       |
| Yap     | YAP-11 | 3.80           | 48.91                                 | 4.13             | 1.67                       |
| Yap     | YAP-12 | 4.50           | 55.02                                 | 9.50             | 2.20                       |
| Yap     | YAP-14 | 6.54           | 51.73                                 | 9.40             | 1.95                       |
| Yap     | YAP-2  | 3.60           | 54.22                                 | 5.75             | 2.36                       |
| Yap     | YAP-3  | 4.33           | 39.53                                 | 3.88             | 1.16                       |
| Yap     | YAP-4  | 3.69           | 55.59                                 | 11.00            | 2.63                       |
| Yap     | YAP-5  | 2.44           | 34.22                                 | 2.13             | 1.04                       |
| Yap     | YAP-6  | 2.78           | 24.91                                 | 4.50             | 1.04                       |
| Yap     | YAP-7  | 3.56           | 53.34                                 | 9.63             | 2.16                       |
| Yap     | YAP-8  | 3.47           | 49.78                                 | 5.25             | 2.11                       |
| Yap     | Yap-15 | 4.46           | 35.13                                 | 12.20            | 1.80                       |
| Yap     | Yap-13 | 2.29           | 58.15                                 | 8.00             | 2.56                       |
| Namdrik | NAM-1  | 2.99           | 50.72                                 | 5.80             | 1.87                       |
| Namdrik | NAM-2  | 3.19           | 56.51                                 | 4.20             | 2.29                       |
| Namdrik | NAM-3  | 2.03           | 42.39                                 | 7.60             | 2.39                       |
| Namdrik | NAM-4  | 4.33           | 52.56                                 | 5.60             | 1.75                       |
| Namdrik | NAM-5  | 2.44           | 53.47                                 | 8.60             | 2.20                       |
| Namdrik | NAM-6  | 1.89           | 49.62                                 | 4.80             | 2.61                       |
