# Supplementary material for: The Micronesia Challenge: Assessing the Relative Contribution of Stressors on Coral Reefs to Facilitate Science-to-Management Feedback
Source: PLoS One. 2015 Jun 18;10(6):e0130823. doi: 10.1371/journal.pone.0130823 (PMC4473011; doi:10.1371/journal.pone.0130823)
Supplement: S3 Table — (PDF) [file pone.0130823.s006.pdf]

| JURISDICTION | REEF-FISHERY REGULATIONS                                                                                                                                                                                                                                                                                                                             | LAND-BASED DISCHARGE REGULATIONS                                                                                                                                                                                                                                                                        | GAPS                                                                                                                                                                                                                                                                                                                                                                                                              |
|--------------|------------------------------------------------------------------------------------------------------------------------------------------------------------------------------------------------------------------------------------------------------------------------------------------------------------------------------------------------------|---------------------------------------------------------------------------------------------------------------------------------------------------------------------------------------------------------------------------------------------------------------------------------------------------------|-------------------------------------------------------------------------------------------------------------------------------------------------------------------------------------------------------------------------------------------------------------------------------------------------------------------------------------------------------------------------------------------------------------------|
| YAP, FSM     | No reef-fish export can exceed 50 lbs per person/event; Fishing with chemicals and explosives prohibited; 3-inch minimum gillnet size; no-take MPA; All laws subject to exclusion for practices in accordance with tradition and custom                                                                                                              | No dumping of trash or any pollutant in unrestricted areas without EPA approval; Earthmoving permit required for development; Environmental impact assessments required for major development pending EPA decision; All laws subject to exclusion for practices in accordance with tradition and custom | Export policies; Controls on night free-dive fishing with flashlights; Protection during spawning periods, size-limits; subsistence catch quota's; SCUBA fishing policies; pollution control for development prior to permitting system; master plan for non-point source watershed discharge; sewage and wastewater regulations; Overlap between roles of regulatory agencies and traditional cultural practices |
| CHUUK, FSM   | Ban on <i>Bolbometopon muricatum</i> and <i>Cheilinus undulatus</i> export; seasonal ban on all grouper sales from January to March; no-take MPA                                                                                                                                                                                                     | Earthmoving and septic/sewer permit required for development; no septic or piggeries 50 ft. from wells, rivers, or coastlines                                                                                                                                                                           | Reef fisheries export policies; controls on night free-dive fishing with flashlights; protection during spawning periods besides groupers, size-limits; subsistence catch quota's; controls on live reef fish trade; SCUBA fishing policies; enforcement; pollution control for development prior to permitting system; master plan for non-point source watershed discharge                                      |
| POHNPEI, FSM | <b>New regulations 2014.</b> Complete ban on <i>Bolbometopon muricatum</i> and <i>Cheilinus undulatus</i> fishing or sale; seasonal ban on <i>Plectropomus areolatus</i> January to May, all other grouper from February to April; SCUBA fishing ban; no-take MPA; 4-inch minimum gillnet size; size-class regulations for 9 food fish* <sup>1</sup> | Permits required for all new residential and commercial development; household septic/sewer system requirements; no dumping of trash or any pollutant in unrestricted areas; Piggeries set back 50 ft. from houses and waterbodies, and must have septic systems                                        | Reef fisheries export policies; controls on night free-dive fishing with flashlights; catch quota's; pollution control for development prior to permitting system; master plan for non-point source watershed discharge                                                                                                                                                                                           |
| KOSRAE, FSM  | SCUBA fishing ban; no-take MPA; <i>Bolbometopon muricatum</i> harvesting ban; prohibition of any destructive fishing methods;                                                                                                                                                                                                                        | Permits required for all new residential and commercial development since 1992; household septic/sewer system requirements; no dumping of trash or any pollutant in unrestricted                                                                                                                        | Controls on night free-dive fishing with flashlights; Protection during spawning periods, size-limits; subsistence catch quota's; pollution control for development prior to                                                                                                                                                                                                                                      |

|                     |                                                                                                                                                                                                                                                                                                     |                                                                                                                                                                                                                                                                      |                                                                                                                                                                                                                                                                           |
|---------------------|-----------------------------------------------------------------------------------------------------------------------------------------------------------------------------------------------------------------------------------------------------------------------------------------------------|----------------------------------------------------------------------------------------------------------------------------------------------------------------------------------------------------------------------------------------------------------------------|---------------------------------------------------------------------------------------------------------------------------------------------------------------------------------------------------------------------------------------------------------------------------|
|                     |                                                                                                                                                                                                                                                                                                     | areas; Piggeries set back 50 ft. from houses and waterbodies, and must have septic systems                                                                                                                                                                           | permitting system; master plan for non-point source watershed discharge                                                                                                                                                                                                   |
| <b>NAMDRIK, RMI</b> | License requirements for commercial fishing or regulated species; no-take MPA's; prohibition of any destructive fishing methods; size and seasonal restrictions for key species, minimum net mesh sizes                                                                                             | No dumping of trash or any pollutant in unrestricted areas; piggery location and waste ordinances; household septic tank requirements                                                                                                                                | Enforcement; community education; capacity; funding; plan for non-point source watershed discharge                                                                                                                                                                        |
| <b>CNMI</b>         | Gill-net ban for drag nets, surround nets, seines and trap nets, with limited cultural exceptions; SCUBA fishing ban; no-take MPA's; no bleach, cyanide, or 'derris'* <sup>2</sup> ; no explosives; no traps; annual commercial catch limits for major reef fish species and families* <sup>3</sup> | Permits required for all new residential and commercial development, including sewer/septic since 1983; Permits required for all point-source discharges since 1986; Permitting revision in 1993 include controlling non-point source pollution for new construction | Controls on night free-dive fishing with flashlights; Protection during spawning periods, size-limits; subsistence catch quota's; enforcement; pollution control for development prior to permitting system; updated master plan for non-point source watershed discharge |

\*<sup>1</sup>14-inches for *Naso unicornis*, all groupers, all trevally and jacks, all sweetlips, *Chlorurus microrhinos*; 10-inches for *Lutjanus gibbus*, all rudderfish, *Hipposcarus longiceps*; 24-inches for *Epinephelus fuscoguttatus*

\*<sup>2</sup>Local term for plant root with rotenone fish poison

\*<sup>3</sup>Annual catch limits that vary based upon US National Marine Fisheries Service analyses, adopted by the Western Pacific Fisheries Management Council for Acanthuridae, Lutjanidae, *Selar crumenophthalmus*, Carangidae, Lethrinidae, Scaridae, Serranidae, Holocentridae, Mugilidae, *Bolbometopon muricatum*, *Cheilinus undulatus*, Carcharhinidae, and all others combined
